# Supplementary figures and images for: Metabolic constraints drive self-organization of specialized cell groups
Source: eLife journal article supplement (doi:10.7554/elife.46735), 2019-06-26

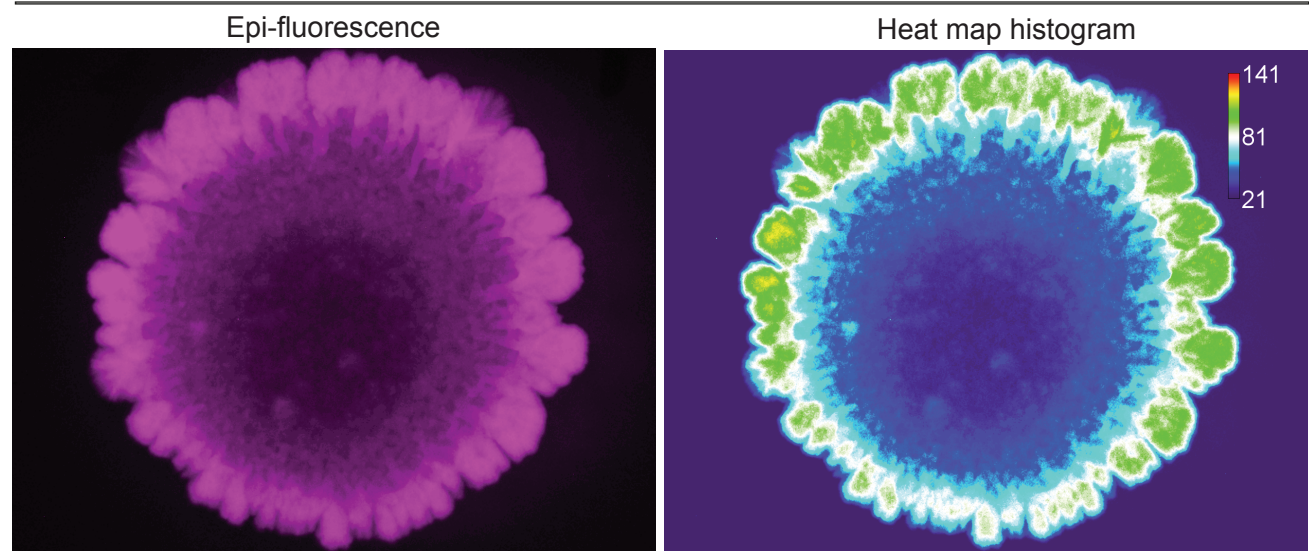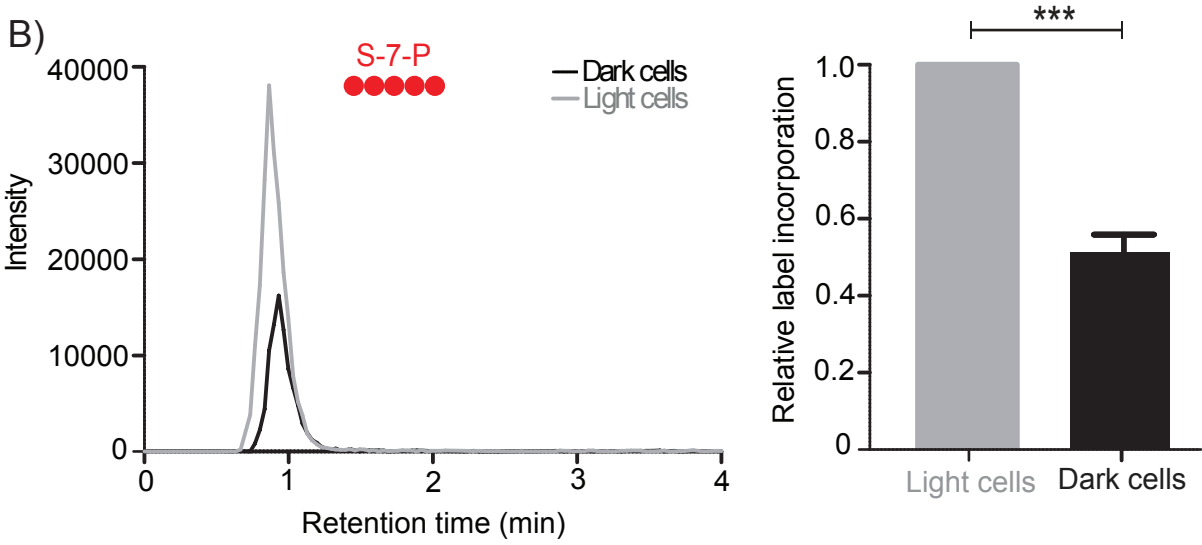

Figure 2-Figure supplement 1

Supplement: supp [file elife-46735-supp-v1.zip]

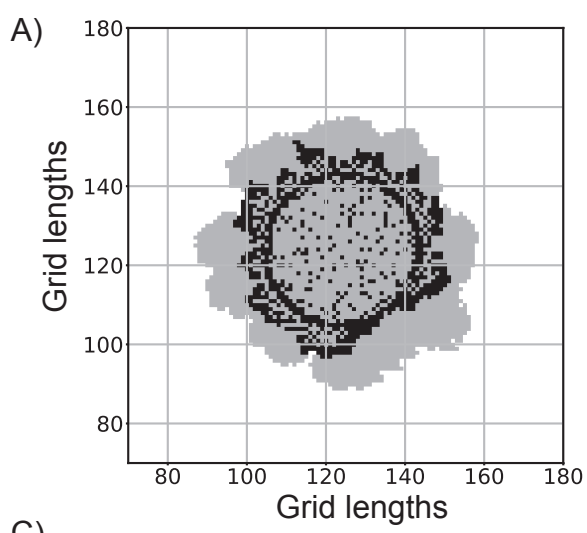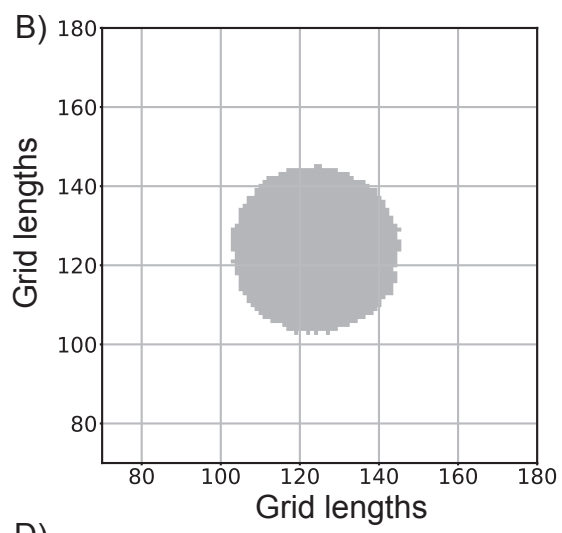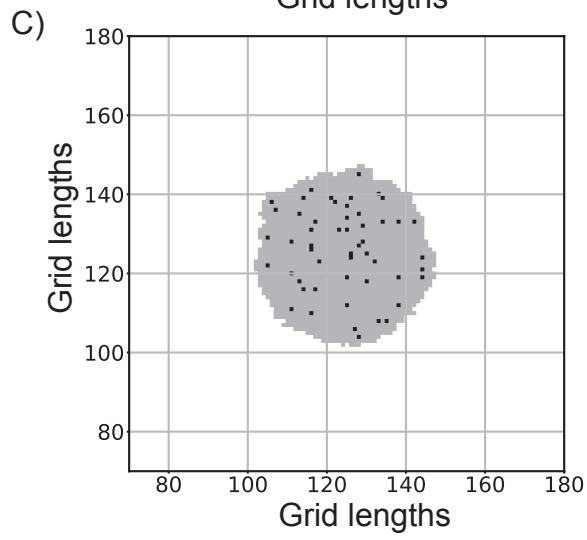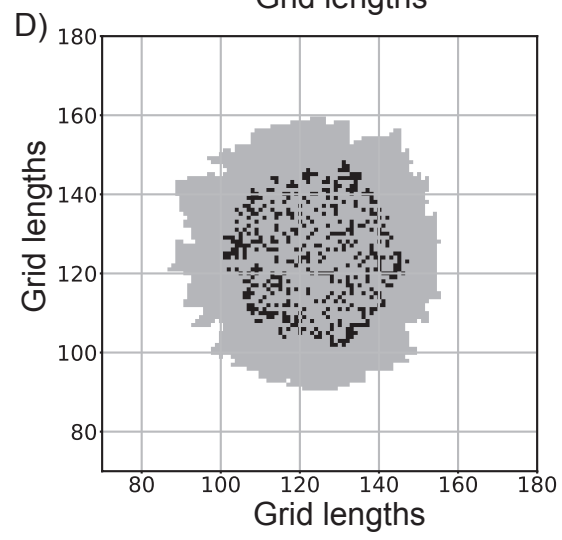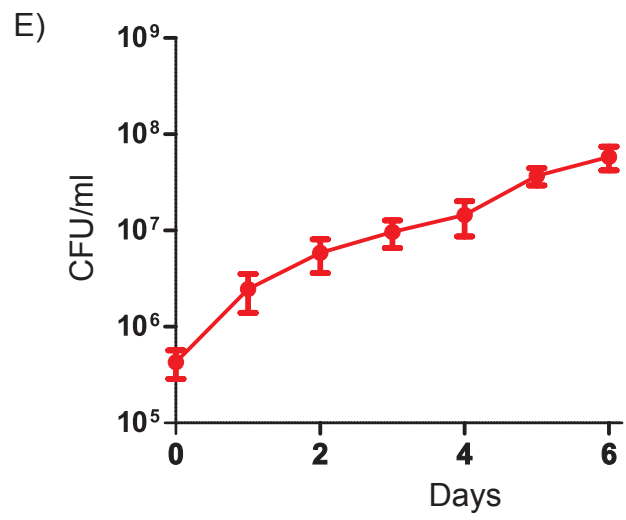

Figure 6-Figure supplement 1

Supplement: supp [file elife-46735-supp-v1.zip]

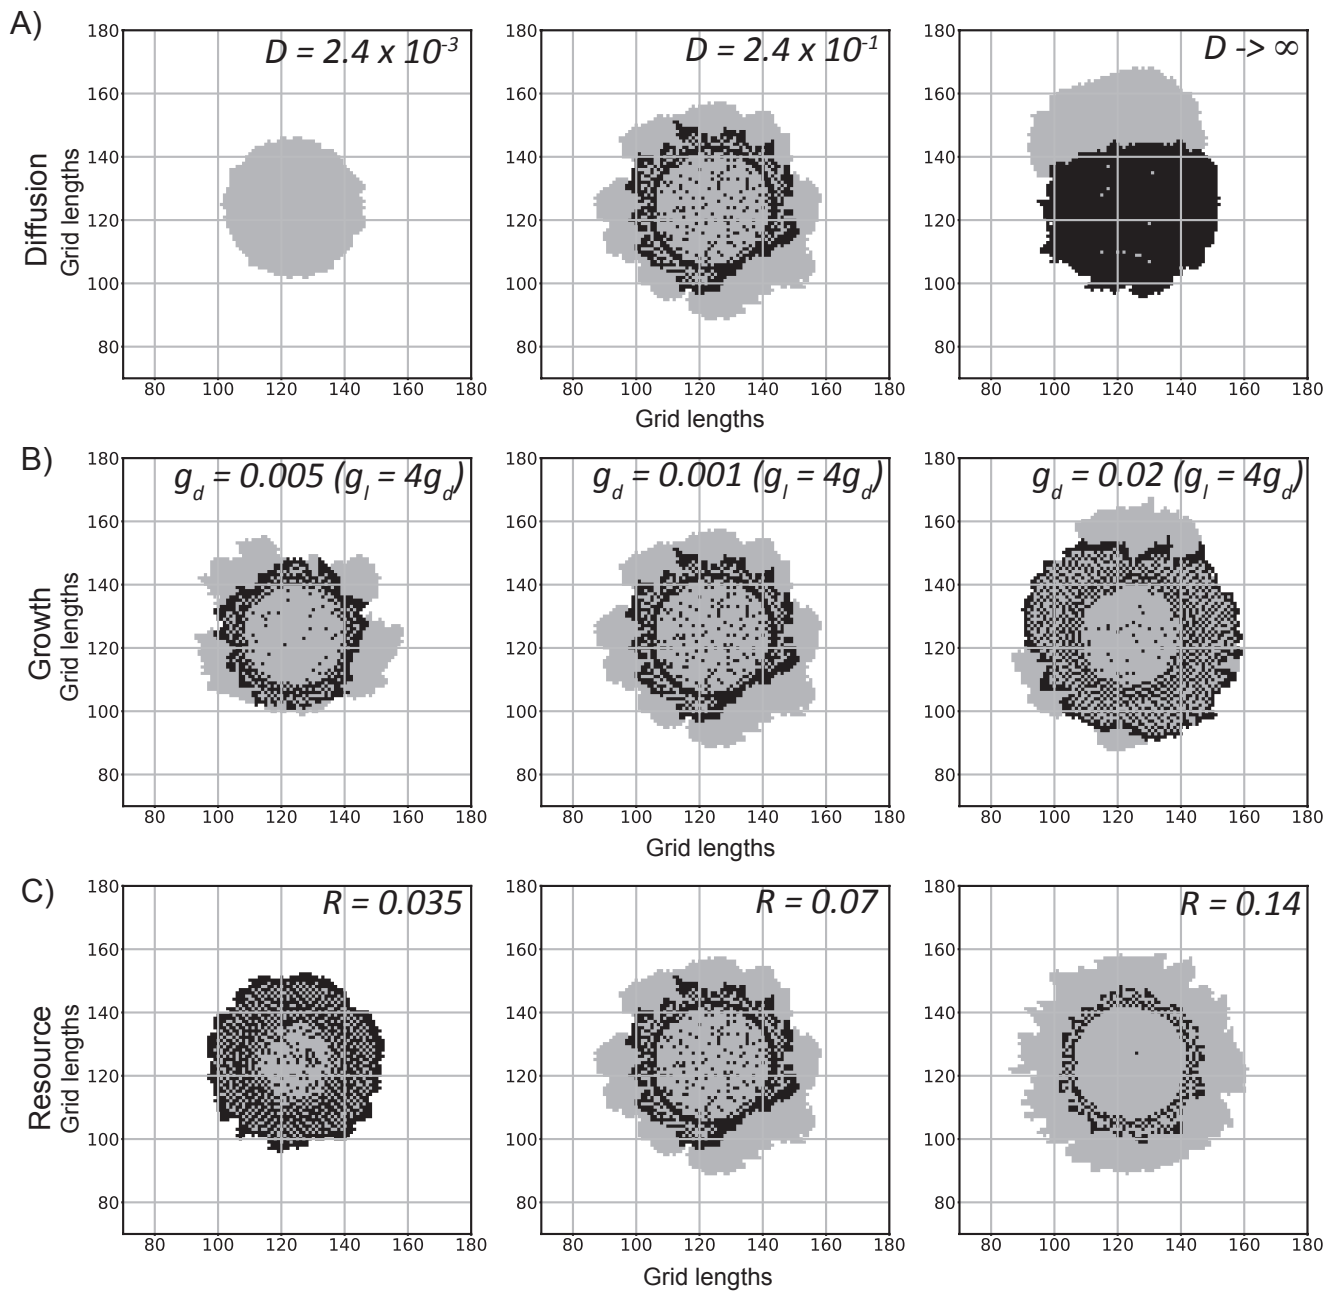

Figure 3-Figure supplement 1

Supplement: supp [file elife-46735-supp-v1.zip]

A)

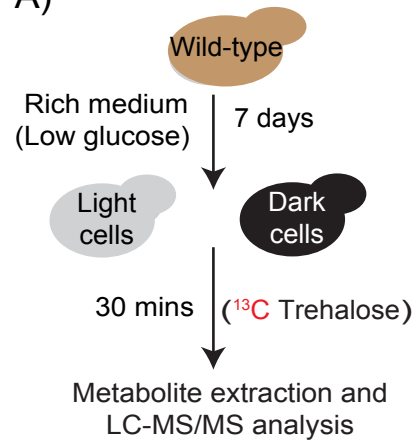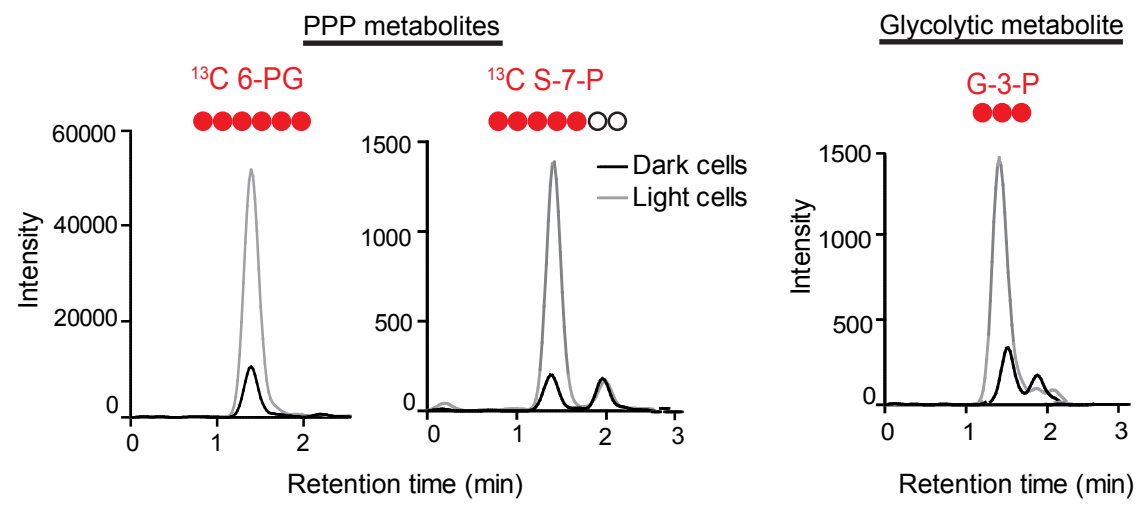

Figure 5-Figure supplement 1

Supplement: supp [file elife-46735-supp-v1.zip]

A)

## Gluconeogenesis reporter

Epi-fluorescence

Heat map histogram

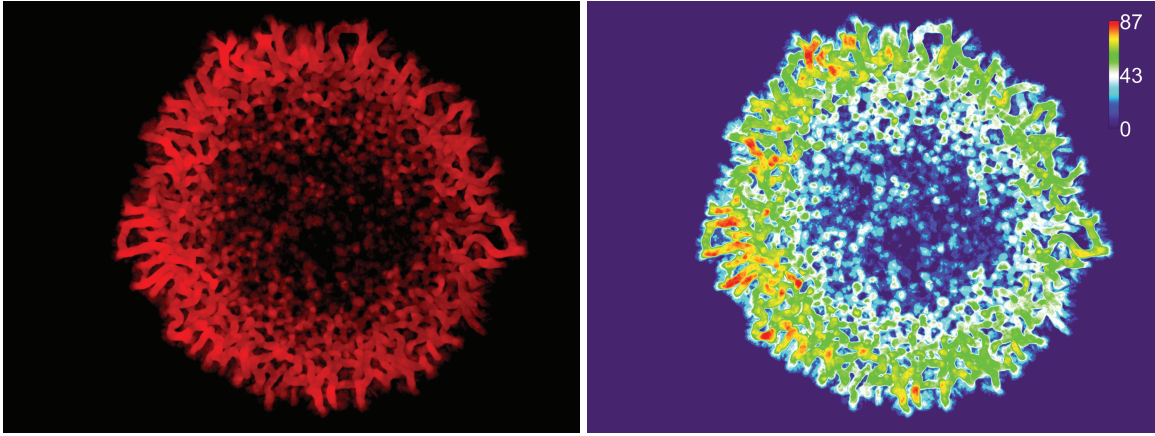

B)

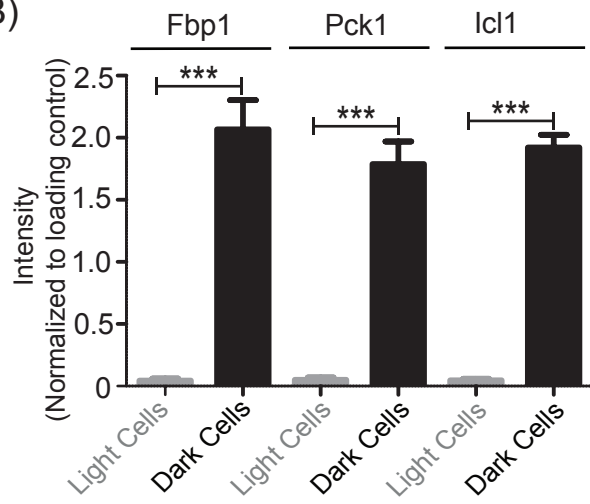

Figure 1-Figure supplement 2

Supplement: supp [file elife-46735-supp-v1.zip]

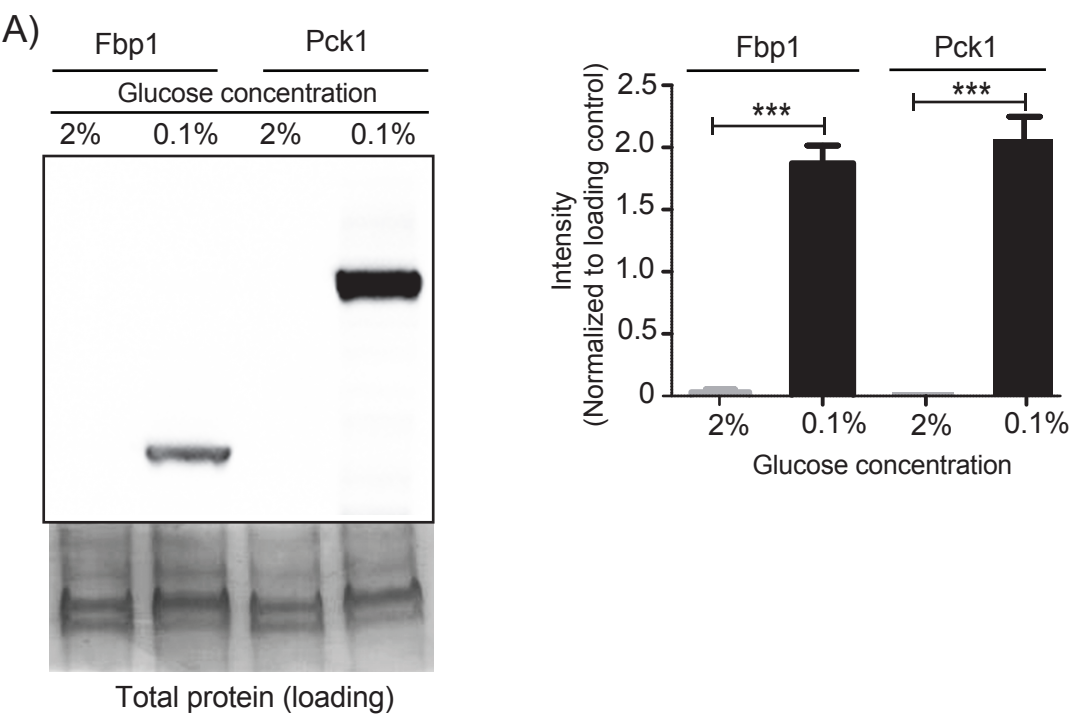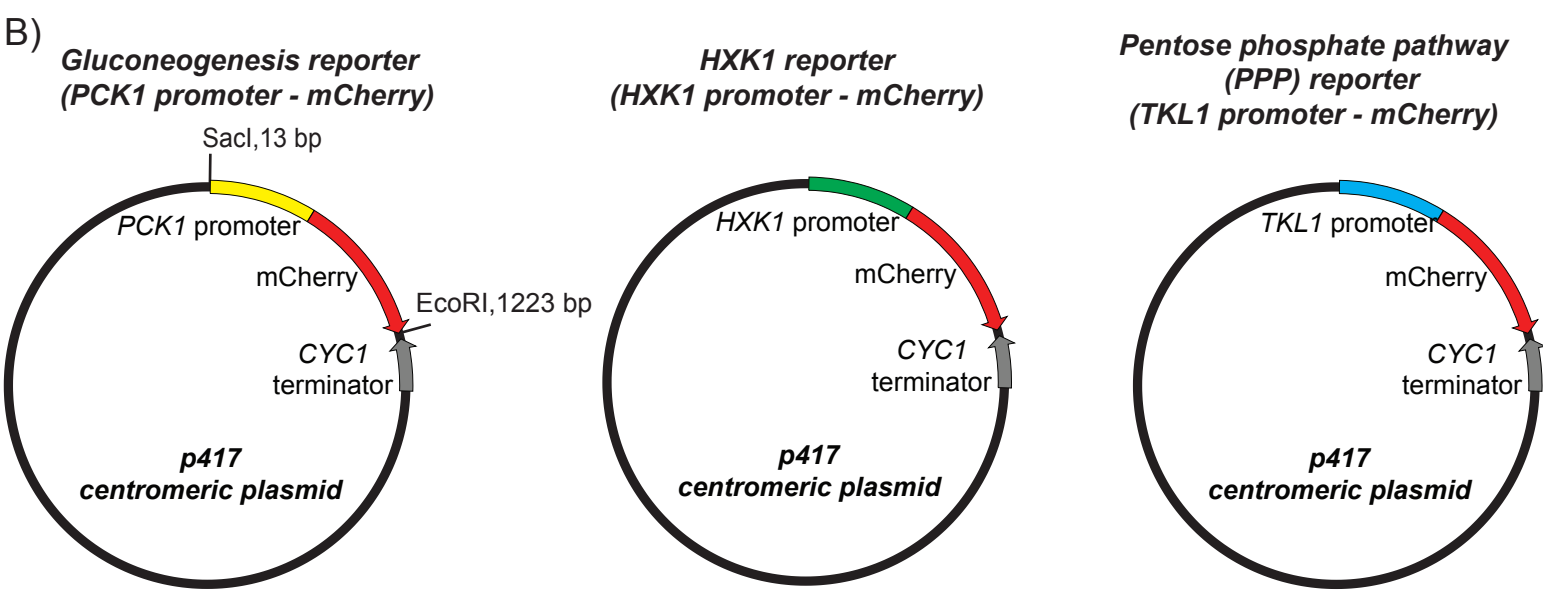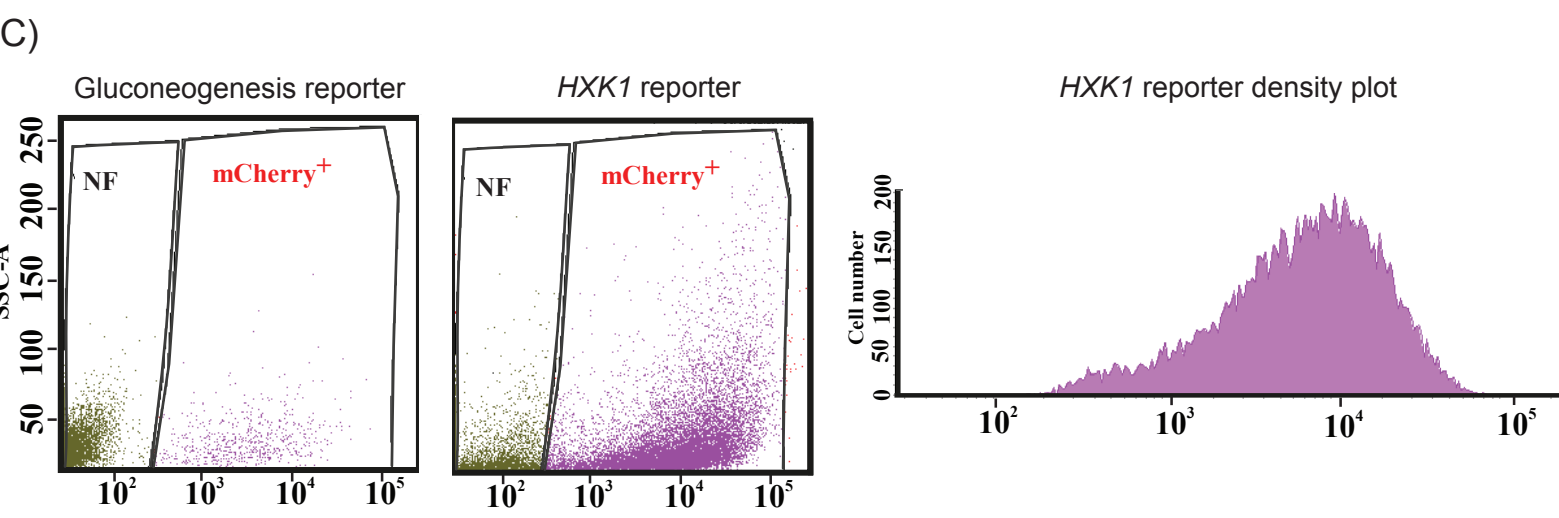

Figure 1-Figure supplement 1

Supplement: supp [file elife-46735-supp-v1.zip]

A)

Mal11

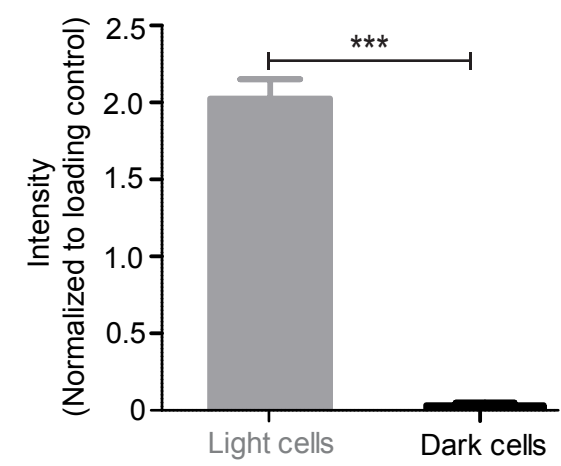

B)

Nth1

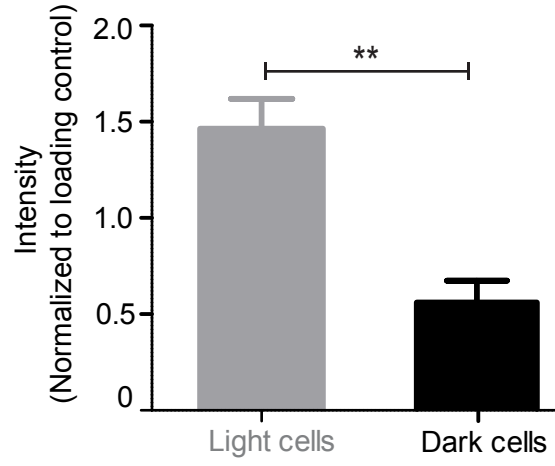

Figure 4-Figure supplement 1

Supplement: supp [file elife-46735-supp-v1.zip]

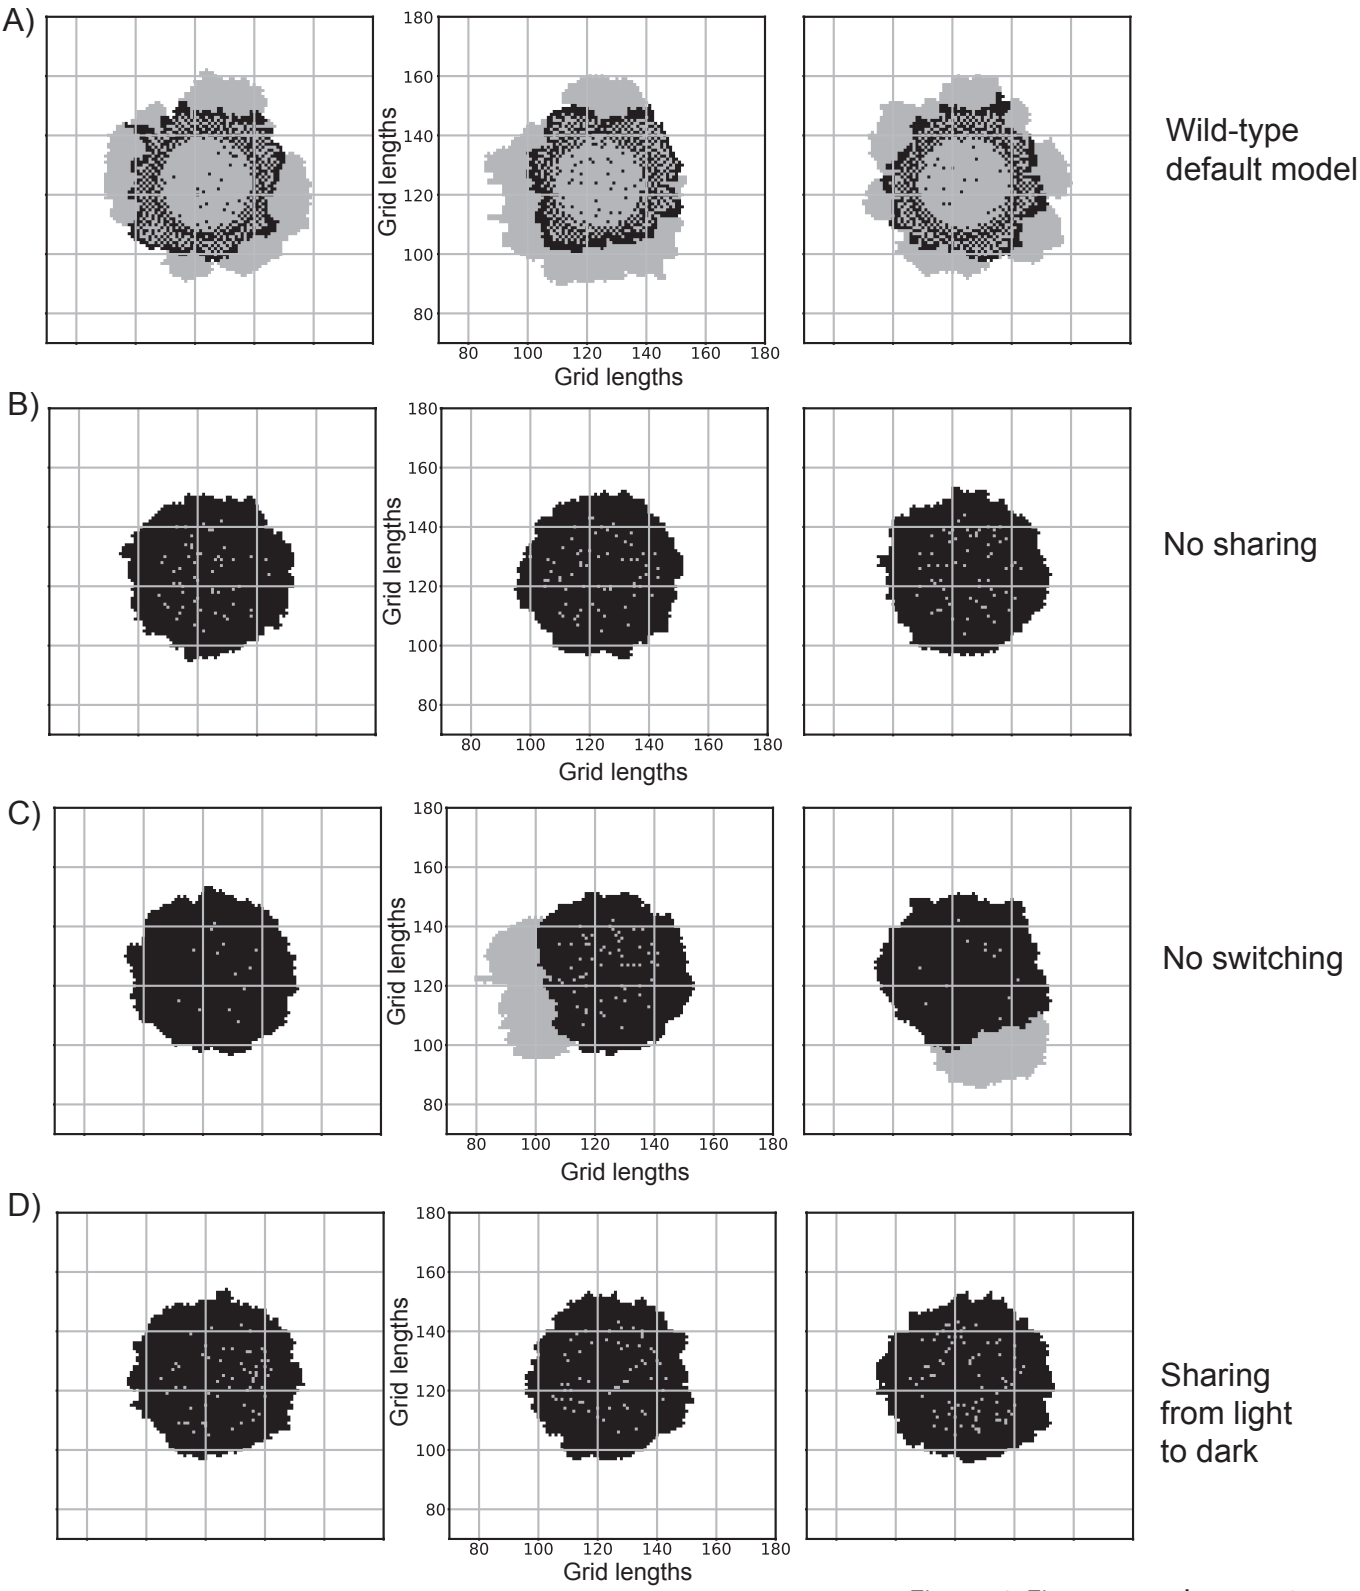

Figure 3-Figure supplement 2

Supplement: supp [file elife-46735-supp-v1.zip]
